# Supplementary material for: Anthracene-assisted inverse transport growth and superconductivity at 3.3 K in unsupported ultrathin {110} Nb and {0001} NbSe2nanoplates
Source: Royal Society of Chemistry journal article supplement (doi:10.1039/c7tc03736h), 2017-01-01
Supplement: c7tc03736h1.pdf [file c7tc03736h1.pdf]

**Supplementary material for**

**Anthracene-Assisted Inverse Transport Growth and Superconductivity at 3.3 K  
in Unsupported Ultrathin {110} Nb and {0001} NbSe<sub>2</sub> Nanoplates**

Jian-Min Li\* and Jie Fang

This PDF file includes: **Figs.S1-S2.**

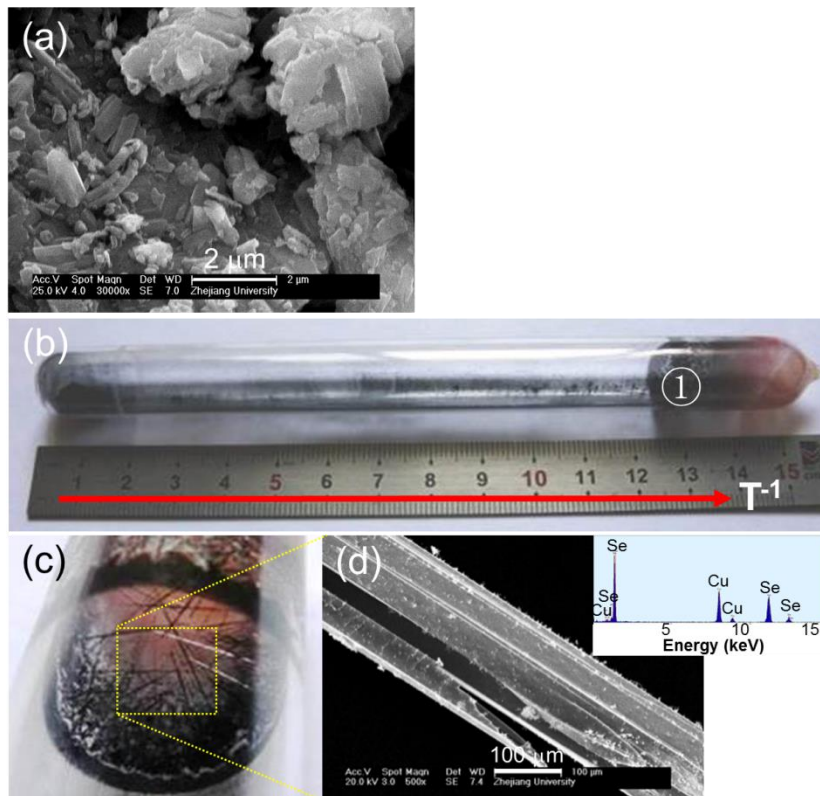

Fig.S1. (a) SEM image of starting NbSe<sub>2</sub> precursors with an average crystal size of about 2 μm. (b) A digital image of a closed-tube vapor-phase growth where an evacuated quartz ampoule was put inside horizontal tubular electric furnace. (c) A digital image of evaporation whisker-like products collected at the low-temperature transfer region (sectional view of the region ① in (b)). (d) SEM image of the yellow dashed box area shown in (c), Inset, a typical EDX spectrum of the whisker-like products in a TEM. Peaks corresponding to pure Se are evident, indicating that Se extraction from the starting material. Cu signals are from copper grid supporting the whiskers.

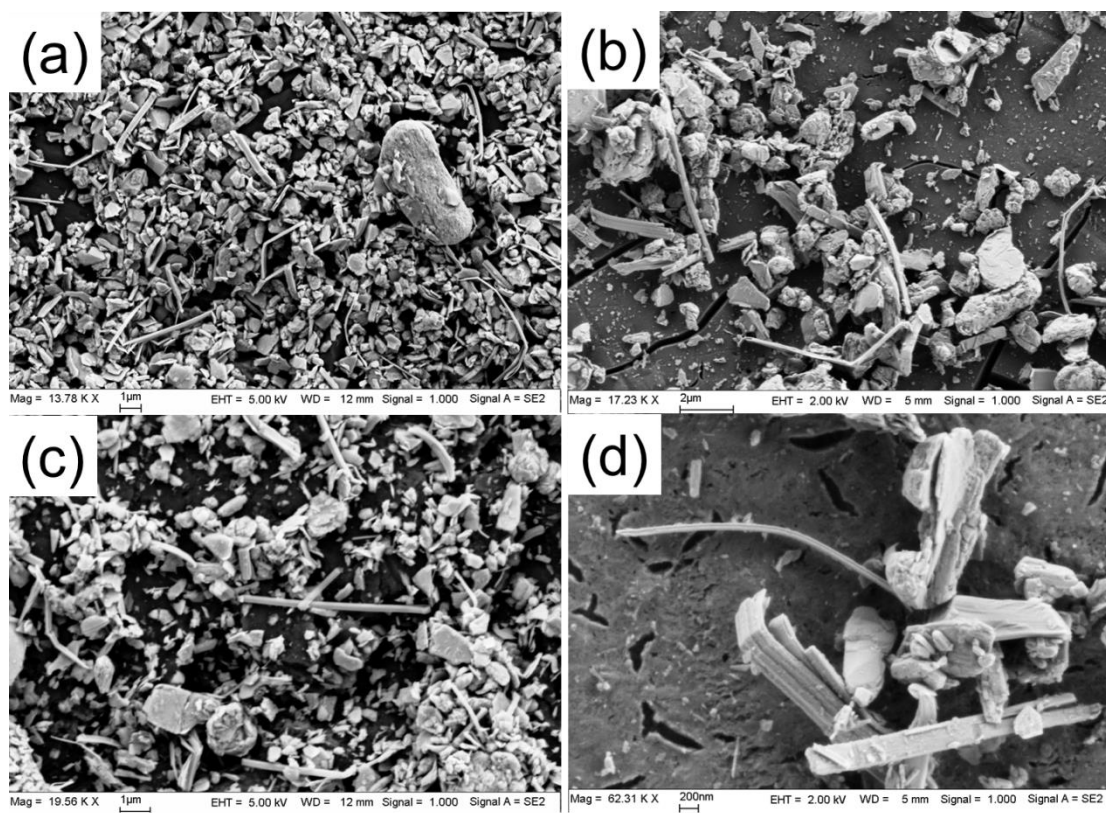

Fig.S2. (a)-(d) SEM images at different magnifications of pure primitive NbSe<sub>2</sub> source after ultrasonic treatment in Ethanol using probe sonicator (Misonix S-4000) with the same working conditions but the processing time up to 10 minutes.
